# Supplementary material for: The Effects of Thermocycling on the Physical Properties and Biocompatibilities of Various CAD/CAM Restorative Materials
Source: MDPI journal article supplement (doi:10.3390/pharmaceutics15082122), 2023-08-10
Supplement: s1 [file s1]

**Supplementary Table 3.** Mean  $\pm$  SD values and statistical analyses of surface roughnesses ( $R_a$  and  $R_q$ ).

| Surface roughness    | Group | Mean $\pm$ SD (nm)            |                                |          |                                |                       |                       |
|----------------------|-------|-------------------------------|--------------------------------|----------|--------------------------------|-----------------------|-----------------------|
|                      |       | Control                       | 1st aged                       | <i>P</i> | 2nd Aged                       | <i>P</i> <sup>†</sup> | <i>P</i> <sup>‡</sup> |
| <i>R<sub>a</sub></i> | M     | 4.82 $\pm$ 0.71 <sup>b</sup>  | 5.00 $\pm$ 0.82 <sup>b</sup>   | .400     | 5.33 $\pm$ 1.21 <sup>b</sup>   | .067                  | .249                  |
|                      | C     | 4.44 $\pm$ 0.51 <sup>b</sup>  | 6.26 $\pm$ 2.53 <sup>b</sup>   | <.001*   | 6.82 $\pm$ 0.86 <sup>b</sup>   | <.001*                | .280                  |
|                      | E     | 6.68 $\pm$ 1.09 <sup>c</sup>  | 8.55 $\pm$ 2.67 <sup>c</sup>   | <.001*   | 11.41 $\pm$ 4.67 <sup>c</sup>  | <.001*                | <.009*                |
|                      | S     | 13.08 $\pm$ 1.37 <sup>d</sup> | 13.55 $\pm$ 1.15 <sup>d</sup>  | .173     | 15.00 $\pm$ 1.79 <sup>d</sup>  | <.001*                | <.009*                |
|                      | Z     | 2.82 $\pm$ 0.48 <sup>a</sup>  | 2.29 $\pm$ 0.28 <sup>a</sup>   | .351     | 3.21 $\pm$ 0.41 <sup>a</sup>   | .002*                 | .004*                 |
| <i>R<sub>q</sub></i> | M     | 6.38 $\pm$ 0.98 <sup>b</sup>  | 6.76 $\pm$ 1.28 <sup>a,b</sup> | .232     | 7.30 $\pm$ 1.86 <sup>a,b</sup> | <.026*                | .213                  |
|                      | C     | 6.44 $\pm$ 0.85 <sup>b</sup>  | 8.60 $\pm$ 3.34 <sup>b</sup>   | .002*    | 9.83 $\pm$ 0.92 <sup>b</sup>   | <.001*                | .070                  |
|                      | E     | 10.02 $\pm$ 1.70 <sup>c</sup> | 15.73 $\pm$ 7.67 <sup>c</sup>  | <.001*   | 21.38 $\pm$ 8.57 <sup>c</sup>  | <.001*                | .014*                 |
|                      | S     | 17.74 $\pm$ 1.80 <sup>d</sup> | 19.12 $\pm$ 1.61 <sup>d</sup>  | .005*    | 21.90 $\pm$ 2.98 <sup>c</sup>  | <.001*                | .004*                 |
|                      | Z     | 3.81 $\pm$ 0.59 <sup>a</sup>  | 4.00 $\pm$ 0.35 <sup>a</sup>   | .157     | 4.32 $\pm$ 0.56 <sup>a</sup>   | .002*                 | .014*                 |

M: IPS e.max CAD, C: Celtra Duo, E: Vita Enamic, S: Cerasmart, Z: Lava Plus Zirconia

Different superscripted letters of each vertical column indicate significant differences ( $P < 0.05$ ).

*P* value were calculated by result of independent samples t-test between control groups and first aged groups.

*P*<sup>†</sup> value were calculated by result of independent samples t-test between control groups and second aged groups.

*P*<sup>‡</sup> value were calculated by result of independent samples t-test between first aged groups and second aged groups.
