# Supplementary material for: The Effects of Thermocycling on the Physical Properties and Biocompatibilities of Various CAD/CAM Restorative Materials
Source: MDPI journal article supplement (doi:10.3390/pharmaceutics15082122), 2023-08-10
Supplement: s1 [file s1]

**Supplementary Table 1.** Mean and SD values of nanoindentation hardnesses (GPa).

| Group | Mean $\pm$ SD (GPa)           |                               |          |                               |                       |                       |
|-------|-------------------------------|-------------------------------|----------|-------------------------------|-----------------------|-----------------------|
|       | Control                       | 1st aged                      | <i>P</i> | 2nd aged                      | <i>P</i> <sup>†</sup> | <i>P</i> <sup>‡</sup> |
| M     | 7.85 $\pm$ 1.22 <sup>b</sup>  | 5.15 $\pm$ 0.81 <sup>b</sup>  | <.001*   | 4.72 $\pm$ 1.02 <sup>b</sup>  | <.001*                | .096                  |
| C     | 7.79 $\pm$ 1.16 <sup>b</sup>  | 6.10 $\pm$ 0.76 <sup>b</sup>  | <.001*   | 5.81 $\pm$ 0.78 <sup>b</sup>  | <.001*                | .170                  |
| E     | 7.05 $\pm$ 0.92 <sup>b</sup>  | 5.09 $\pm$ 2.79 <sup>b</sup>  | <.001*   | 4.17 $\pm$ 3.02 <sup>b</sup>  | <.001*                | .252                  |
| S     | 0.97 $\pm$ 0.25 <sup>a</sup>  | 0.80 $\pm$ 0.24 <sup>a</sup>  | .011*    | 0.77 $\pm$ 0.30 <sup>a</sup>  | .009*                 | .697                  |
| Z     | 19.84 $\pm$ 3.09 <sup>c</sup> | 19.79 $\pm$ 2.87 <sup>c</sup> | .954     | 19.35 $\pm$ 3.63 <sup>c</sup> | .599                  | .625                  |

M: IPS e.max CAD, C: Celtra Duo, E: Vita Enamic, S: Cerasmart, Z: Lava™ Plus Zirconia.

Different superscripted letters in each vertical column indicate significant differences ( $P < 0.05$ ).

*P* value were calculated by result of independent samples t-test between control groups and first aged groups.

*P*<sup>†</sup> value were calculated by result of independent samples t-test between control groups and second aged groups.

*P*<sup>‡</sup> value were calculated by result of independent samples t-test between first aged groups and second aged groups.
