# Supplementary material for: The Effects of Thermocycling on the Physical Properties and Biocompatibilities of Various CAD/CAM Restorative Materials
Source: MDPI journal article supplement (doi:10.3390/pharmaceutics15082122), 2023-08-10
Supplement: s1 [file s1]

**Supplementary Table 2.** Means and standard deviations of the Young's moduli (GPa).

| Group | Mean $\pm$ SD (GPa)             |                                 |          |                                 |                       |                       |
|-------|---------------------------------|---------------------------------|----------|---------------------------------|-----------------------|-----------------------|
|       | Control                         | 1st aged                        | <i>P</i> | 2nd aged                        | <i>P</i> <sup>†</sup> | <i>P</i> <sup>‡</sup> |
| M     | 101.43 $\pm$ 11.35 <sup>c</sup> | 80.48 $\pm$ 8.56 <sup>c</sup>   | <.001*   | 74.16 $\pm$ 10.12 <sup>c</sup>  | <.001*                | .016*                 |
| C     | 102.22 $\pm$ 7.57 <sup>c</sup>  | 73.16 $\pm$ 7.04 <sup>c</sup>   | <.001*   | 72.45 $\pm$ 5.76 <sup>c</sup>   | <.001*                | .680                  |
| E     | 58.91 $\pm$ 7.05 <sup>b</sup>   | 45.78 $\pm$ 18.38 <sup>b</sup>  | <.001*   | 39.22 $\pm$ 18.98 <sup>b</sup>  | <.001*                | .203                  |
| S     | 12.69 $\pm$ 1.82 <sup>a</sup>   | 11.60 $\pm$ 1.93 <sup>a</sup>   | .038*    | 11.29 $\pm$ 2.13 <sup>a</sup>   | .013*                 | .579                  |
| Z     | 252.70 $\pm$ 38.57 <sup>d</sup> | 238.67 $\pm$ 25.74 <sup>d</sup> | .122     | 224.39 $\pm$ 29.99 <sup>d</sup> | .004*                 | .066                  |

M: IPS e.max CAD, C: Celtra Duo, E: Vita Enamic, S: Cerasmart, Z: LavaTM Plus Zirconia.

Different superscripted letters of each vertical column indicate significant differences ( $P < 0.05$ ).

*P* value were calculated by result of independent samples t-test between control groups and first aged groups.

*P*<sup>†</sup> value were calculated by result of independent samples t-test between control groups and second aged groups.

*P*<sup>‡</sup> value were calculated by result of independent samples t-test between first aged groups and second aged groups.
