# Supplementary material for: The Effects of Thermocycling on the Physical Properties and Biocompatibilities of Various CAD/CAM Restorative Materials
Source: MDPI journal article supplement (doi:10.3390/pharmaceutics15082122), 2023-08-10
Supplement: s1 [file s1]

**Supplementary Table 4.** Means and standard deviations of the contact angles (degrees).

| Group | Mean $\pm$ SD (degrees)         |                                 |          |                                |                       |                       |
|-------|---------------------------------|---------------------------------|----------|--------------------------------|-----------------------|-----------------------|
|       | Control                         | 1st aged                        | <i>P</i> | 2nd aged                       | <i>P</i> <sup>†</sup> | <i>P</i> <sup>‡</sup> |
| M     | 54.04 $\pm$ 16.61 <sup>a</sup>  | 38.58 $\pm$ 11.17 <sup>a</sup>  | <.001*   | 37.43 $\pm$ 10.96 <sup>b</sup> | <.001*                | .663                  |
| C     | 75.31 $\pm$ 5.16 <sup>b</sup>   | 69.84 $\pm$ 5.12 <sup>c</sup>   | <.001*   | 28.11 $\pm$ 12.43 <sup>a</sup> | <.001*                | <.001*                |
| E     | 56.41 $\pm$ 12.96 <sup>a</sup>  | 53.73 $\pm$ 12.56 <sup>b</sup>  | .375     | 48.49 $\pm$ 10.58 <sup>c</sup> | .006*                 | .060                  |
| S     | 61.79 $\pm$ 7.79 <sup>a,b</sup> | 59.44 $\pm$ 7.50 <sup>b,c</sup> | .198     | 55.97 $\pm$ 8.55 <sup>c</sup>  | .004*                 | .071                  |
| Z     | 96.08 $\pm$ 41.19 <sup>c</sup>  | 95.09 $\pm$ 48.30 <sup>d</sup>  | .925     | 76.94 $\pm$ 17.19 <sup>d</sup> | .012*                 | .037*                 |

M: IPS e.max CAD, C: Celtra Duo, E: Vita Enamic, S: Cerasmart, Z: Lava Plus Zirconia

Different superscripted letters of each vertical column indicate significant differences ( $P < 0.05$ ).

*P* value were calculated by result of independent samples t-test between control groups and first aged groups.

*P*<sup>†</sup> value were calculated by result of independent samples t-test between control groups and second aged groups.

*P*<sup>‡</sup> value were calculated by result of independent samples t-test between first aged groups and second aged groups.
