# Supplementary material for: The Effects of Thermocycling on the Physical Properties and Biocompatibilities of Various CAD/CAM Restorative Materials
Source: Pharmaceutics. 2023 Aug 10;15(8):2122. doi: 10.3390/pharmaceutics15082122 (PMC10459511; doi:10.3390/pharmaceutics15082122)
Supplement: Supplementary file 1 [file pharmaceutics-15-02122-s001.zip]

Archive with 4 entries (4 files):
- Supplementary Table 1 (revised).pdf
- Supplementary Table 2 (revised).pdf
- Supplementary Table 3 (revised).pdf
- Supplementary Table 4 (reivised).pdf
